# Supplementary material
Source: HighWire-hosted journal article supplement (https://www.ajnr.org/highwire/filestream/52073/field_highwire_adjunct_files/0/2204_tables.pdf)
Supplement: 2204_tables.pdf [file 2204_tables.pdf]

**On-line Table 1: Sonographic findings of 213 partially cystic thyroid nodules**

| Sonographic Features                | Benign<br>(n = 202) (%) | Malignant<br>(n = 11) (%) | P<br>Value         |
|-------------------------------------|-------------------------|---------------------------|--------------------|
| Configuration                       |                         |                           |                    |
| Concentric                          | 109 (53.7)              | 2 (0.9)                   | <.001 <sup>a</sup> |
| Eccentric and blunt angle           | 67 (29.6)               | 3 (1.4)                   | .484               |
| Eccentric and acute angle           | 11 (4.7)                | 8 (3.8)                   | <.001 <sup>a</sup> |
| Multiseptate                        | 9 (4.2)                 | 0 (0)                     | .615               |
| Calcification                       |                         |                           |                    |
| Microcalcifications                 | 0 (0)                   | 7 (3.3)                   | <.001 <sup>a</sup> |
| Macrocalcifications                 | 2 (0.9)                 | 0 (0)                     | .899               |
| Margin                              |                         |                           |                    |
| Smooth                              | 163 (76.5)              | 0 (0)                     | <.001 <sup>a</sup> |
| Microlobulated                      | 30 (14.1)               | 5 (2.4)                   | .020               |
| Macrolobulated                      | 5 (2.4)                 | 5 (2.4)                   | <.001 <sup>a</sup> |
| Irregular                           | 0 (0)                   | 0 (0)                     | 0                  |
| Perinodular infiltration            | 0 (0)                   | 1 (0.5)                   | .052               |
| Vascularity                         |                         |                           |                    |
| Nonvasculature                      | 63 (29.6)               | 1 (0.5)                   | .119               |
| Peripheral                          | 112 (52.6)              | 0 (0)                     | <.001 <sup>a</sup> |
| Centripetal in pedicle              | 6 (2.9)                 | 2 (0.9)                   | .057               |
| Mildly increased                    | 18 (8.5)                | 7 (3.3)                   | <.001 <sup>a</sup> |
| Moderately increased                | 3 (1.4)                 | 1 (0.5)                   | .192               |
| Spongiform or daughter cyst         |                         |                           |                    |
| Spongiform appearance               | 117 (54.9)              | 0 (0)                     | .244               |
| Daughter cysts                      | 25 (11.7)               | 0 (0)                     | .310               |
| Colloid crystal                     | 31 (14.6)               | 0 (0)                     | .169               |
| Nodule shape                        |                         |                           |                    |
| Ovoid or flat                       | 184 (86.4)              | 9 (4.2)                   | .276               |
| Round                               | 18 (8.5)                | 2 (0.9)                   | .276               |
| Echogenicity of the solid component |                         |                           |                    |
| Isoechogenicity                     | 147 (69.0)              | 5 (2.4)                   | .054               |
| Hypoechoogenicity                   | 40 (19.0)               | 6 (2.8)                   | .016               |
| Marked hypoechoogenicity            | 9 (4.2)                 | 0 (0)                     | .613               |

<sup>a</sup> Statistically significant value.

**On-line Table 2: Comparison of prospective sonographic diagnosis with cytopathologic diagnosis**

| Sonographic Classification | Final Diagnosis |           | Pathology (No.) |
|----------------------------|-----------------|-----------|-----------------|
|                            | Benign          | Malignant |                 |
| Benign features            | 182             | 0         | NH (37), FA (1) |
| Probably benign            | 16              | 3         | PTC (3)         |
| Suspicious for malignancy  | 4               | 3         | PTC (3), NH (4) |
| Malignant features         | 0               | 5         | PTC (5)         |
| Subtotal                   | 202             | 11        | 53              |

**On-line Table 3: Diagnostic index and odds ratio for individual sonographic features**

| Sonographic Features               | Sensitivity (%) | Specificity (%) | PPV (%) | NPV (%) | Accuracy (%) | Odds Ratio |
|------------------------------------|-----------------|-----------------|---------|---------|--------------|------------|
| <b>Malignant</b>                   |                 |                 |         |         |              |            |
| Eccentric and acute angle          | 72.7            | 94.1            | 66.7    | 98.5    | 93.0         | 42.222     |
| Microcalcifications                | 63.6            | 100             | 100     | 98.1    | 98.1         | UA         |
| Macrolobulation                    | 45.5            | 2.5             | 50      | 97.0    | 94.8         | 32.833     |
| Perinodular infiltration           | 9.1             | 100             | 100     | 98.5    | 95.3         | UA         |
| Centripetal vascularity in pedicle | 18.2            | 97.0            | 25.0    | 95.6    | 93.0         | 7.259      |
| Hypoechoogenicity                  | 54.5            | 97.7            | 12.8    | 97.0    | 78.4         | UA         |
| <b>Benign</b>                      |                 |                 |         |         |              |            |
| Concentric configuration           | 54.0            | 100             | 10.6    | 100     | 56.3         | UA         |
| Eccentric and blunt angle          | 33.2            | 72.7            | 5.6     | 95.7    | 35.2         | 0.756      |
| Smooth margin                      | 80.7            | 100             | 22.0    | 100     | 81.7         | UA         |
| No vascularity                     | 30.2            | 90.9            | 6.2     | 98.4    | 33.3         | 2.231      |
| Peripheral vascularity             | 54.5            | 100             | 10.7    | 100     | 56.8         | UA         |
| Spongiform appearance              | 10.4            | 100             | 5.9     | 100     | 16.9         | UA         |
| Daughter cysts                     | 89.6            | 100             | 5.7     | 100     | 15.0         | UA         |
| Colloid crystal                    | 15.4            | 100             | 6.0     | 100     | 19.7         | UA         |
| Ovoid or flat                      | 91.4            | 18.2            | 95.3    | 10.0    | 87.3         | 0.440      |
| Isoechoogenicity                   | 73.3            | 54.5            | 10.0    | 96.7    | 7            | 0.304      |
| Marked hypoechoogenicity           | 4.5             | 100             | 100     | 4.4     | 9.4          | UA         |

**On-line Table 4: Diagnostic index in combination of malignant sonographic features**

| Malignant Sonographic Features | Sensitivity (%) | Specificity (%) | PPV (%) | NPV (%) | Accuracy |
|--------------------------------|-----------------|-----------------|---------|---------|----------|
| A or B                         | 90.9            | 94.1            | 45.5    | 99.5    | 93.9     |
| A or C                         | 54.5            | 92.6            | 28.6    | 97.4    | 90.6     |
| A or D                         | 72.7            | 93.1            | 36.4    | 98.4    | 92.0     |
| B or C                         | 63.6            | 97.5            | 58.3    | 98.0    | 95.8     |
| B or D                         | 63.6            | 98.0            | 63.6    | 98.0    | 96.2     |
| C or D                         | 63.6            | 95.0            | 41.2    | 98.0    | 93.4     |
| A or B or C                    | 90.9            | 92.6            | 40.0    | 99.5    | 92.5     |
| A or B or D                    | 90.9            | 93.1            | 41.7    | 99.5    | 93.0     |
| A or C or D                    | 72.7            | 91.1            | 30.8    | 98.4    | 90.1     |
| B or C or D                    | 72.7            | 95.0            | 44.4    | 98.5    | 93.9     |
| A or B or C or D               | 90.9            | 90.1            | 33.3    | 99.5    | 90.1     |
